# Supplementary material
Source: PubMed Central journal article supplement (PMC4174932)
Supplement: 2128a9b73c47b626874efca88043014a_genetics.114.161513-2.pdf [file 2128a9b73c47b626874efca88043014a_genetics.114.161513-2.pdf]

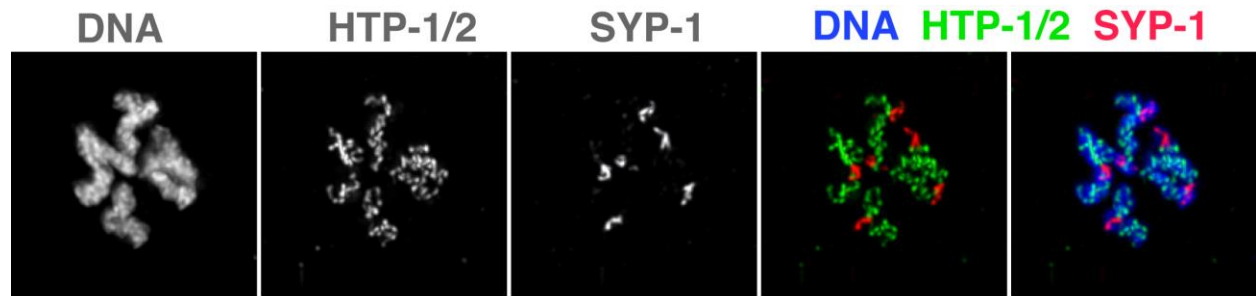

## Diplotene

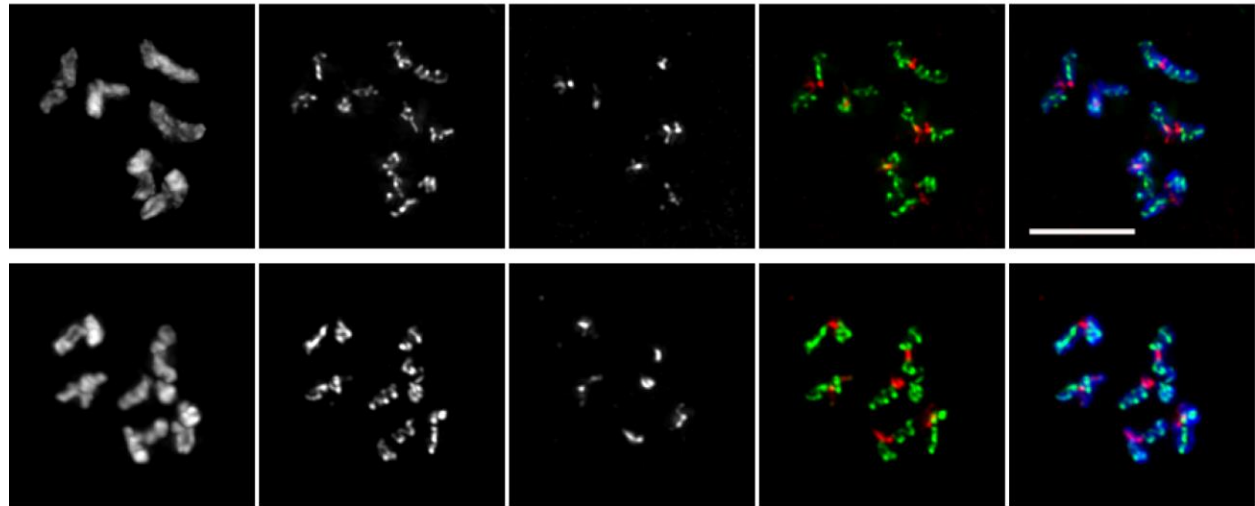

## Diakinesis

**Figure S2 Wild-type diplotene and diakinesis-stage oocytes, for comparison with Figure 4A and B.** Images show chromosomes stained with antibodies against chromosome axis proteins HTP-1/2 and SC central region protein SYP-1. As in [\(Martinez-Perez et al. 2008\)](#), the SYP-1 and HTP-1/2 proteins localize to reciprocal domains as the chromosomes desynapse in diplotene nuclei and maintain reciprocal localization of SYP-1 and HTP-1/2 on bivalents in early diakinesis nuclei. In contrast with the *him-6* mutant, where a subset of bivalents dissociates into univalents during progression through diakinesis, all six bivalents remain associated via chiasmata throughout diakinesis in wild type. Scale bar = 5 $\mu$ m.
